# Supplementary material for: Modeling human HSV infection via a vascularized immune-competent skin-on-chip platform
Source: PubMed Central journal article supplement (PMC9485166; doi:10.1038/s41467-022-33114-1), 2022-09-19
Supplement: 41467_2022_33114_MOESM8_ESM.pdf [file 41467_2022_33114_MOESM8_ESM.pdf]

**Title:** Supplementary Data 1.

**Description:** Primary antibody summary.

**Title:** Supplementary Movie 1.

**Description:** FITC-Dextran (green) perfusion of microvascular network in a skin-on-chip coated with human dermal microvascular endothelial cells.

**Title:** Supplementary Movie 2.

**Description:** FITC-Dextran (green) perfusion of microvascular network in a skin-on-chip constructed without human dermal microvascular endothelial cells.

**Title:** Supplementary Movie 3.

**Description:** Neutrophil trans-endothelium extravasation and migration in response to epidermal infection of HSV-1, as shown in Figure 4d.
